# Supplementary material for: Divergent Effect of Central Incretin Receptors Inhibition in a Rat Model of Sporadic Alzheimer’s Disease
Source: MDPI journal article supplement (doi:10.3390/ijms23010548), 2022-01-04
Supplement: s1 [file s1]

# CytC – HPC Figure 2Aiii

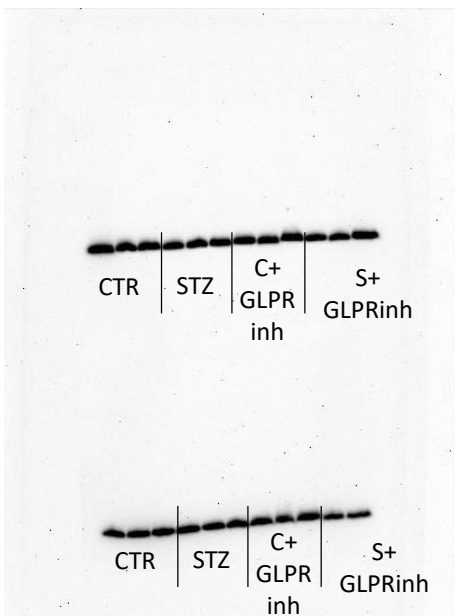

Total proteins on gels visualized using UV (TGX Stain-Free 12% gels) – Figure 2Aiii

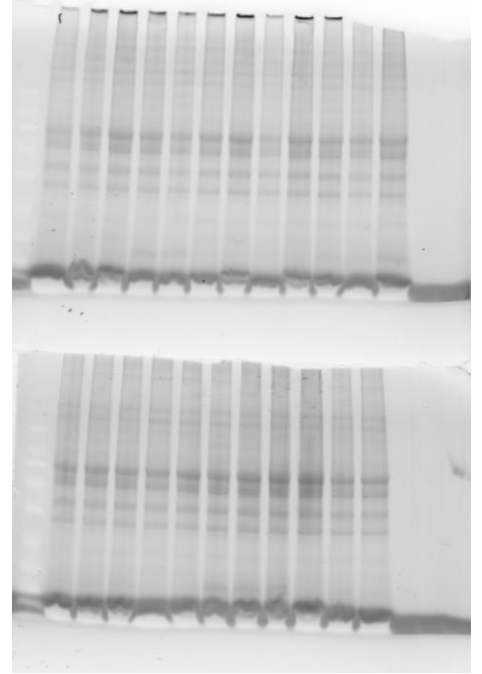

## COXIV – HPC Figure 2Ai

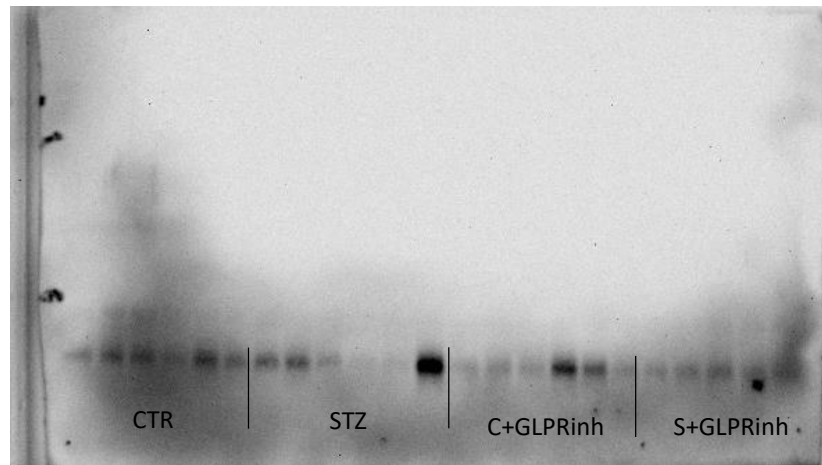

## PDH – HPC Figure 2Av

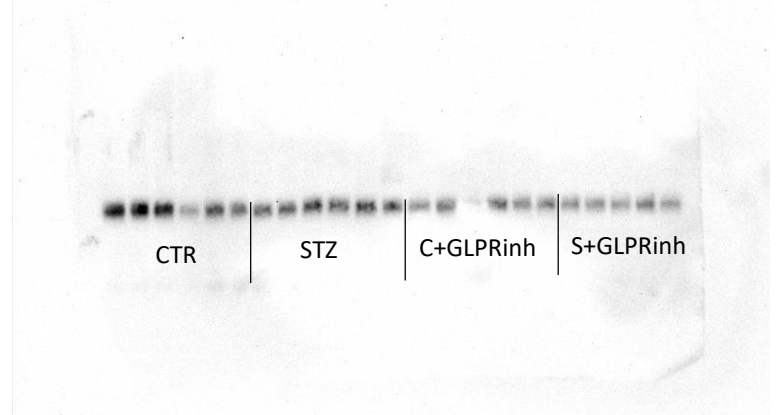

Total proteins on gels visualized using UV (TGX Stain-Free 12% gels) – For Figures 2Ai and 2Av

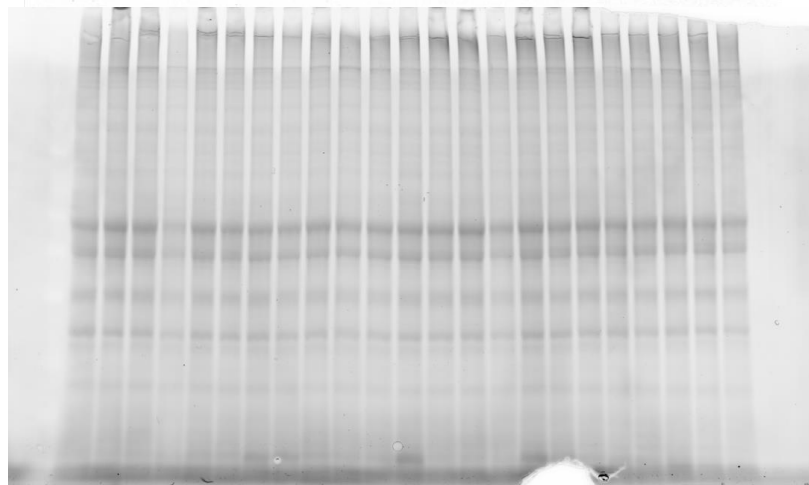

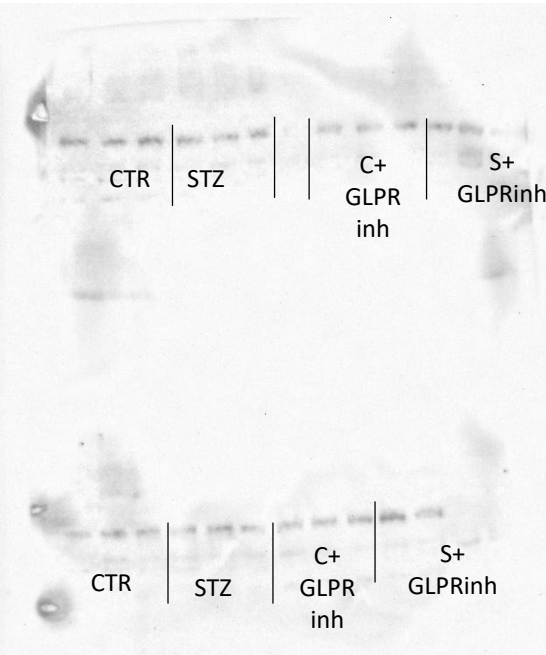

AMPK– HPC  
Figure 3Aiii

Total proteins on  
gels visualized  
using UV (TGX  
Stain-Free 12%  
gels) – Figure 3Aiii

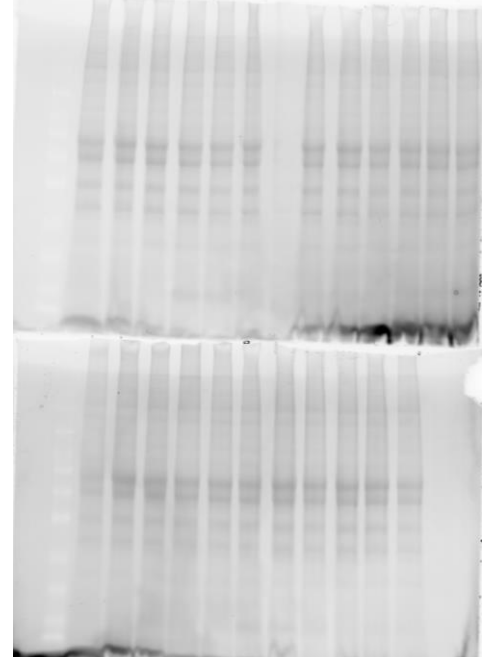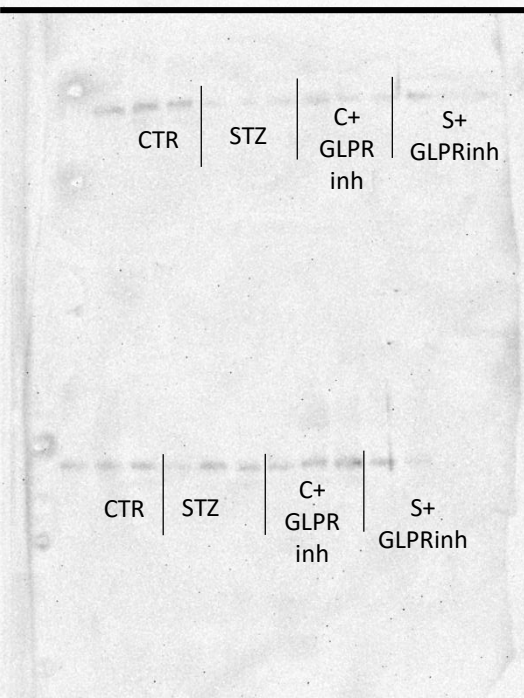

pAMPK– HPC  
Figure 3Ai

Total proteins on  
gels visualized  
using UV (TGX  
Stain-Free 12%  
gels) – Figure 3Ai

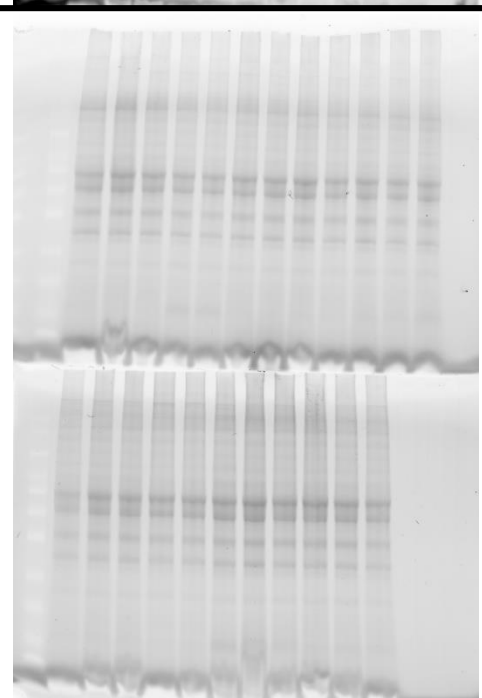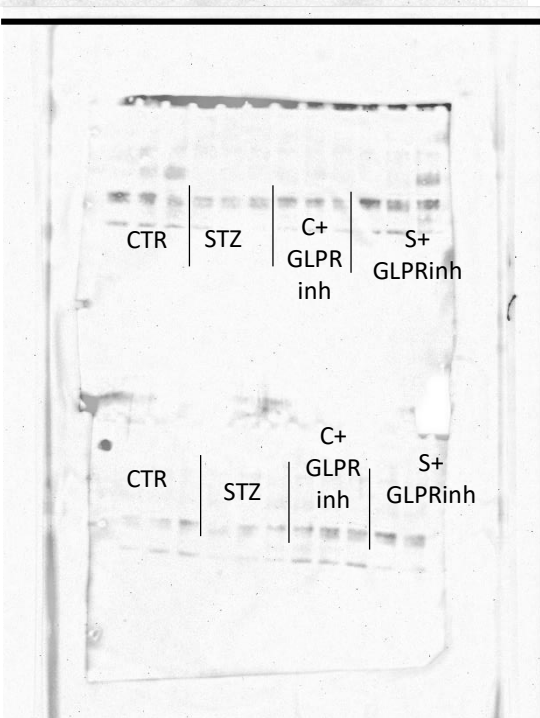

c-fos– HPC  
Figure 4Ai

Total proteins on  
gels visualized  
using UV (TGX  
Stain-Free 12%  
gels) – Figure 4Ai

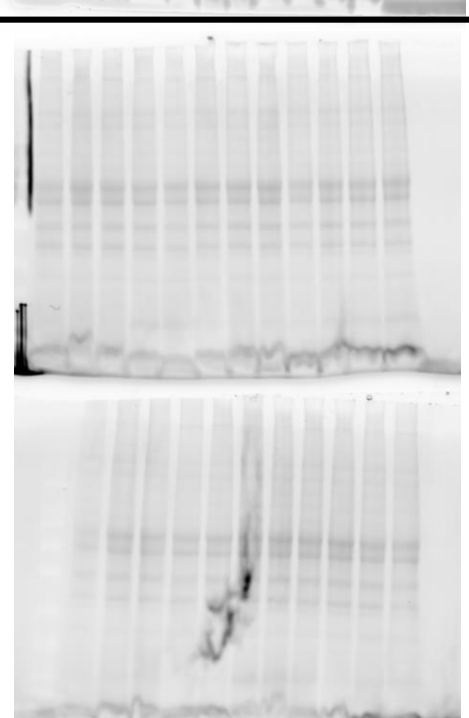

CytC– HPT  
Figure 2Aiv

CTR | STZ | C+  
GLPR  
inh | S+  
GLPRinh

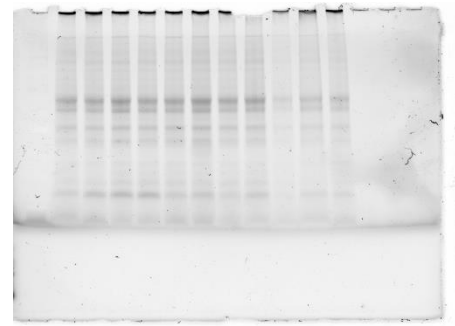

Total proteins on  
gels visualized  
using UV (TGX  
Stain-Free 12%  
gels) – Figure  
2Aiv

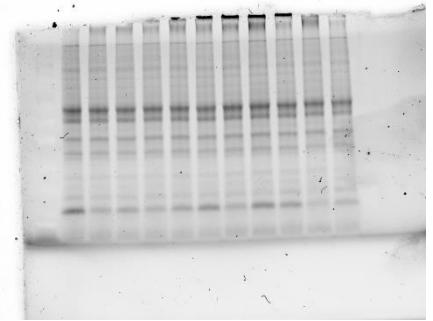

COXIV– HPT  
Figure 2Aii

CTR | STZ | C+  
GLPR  
inh | S+  
GLPRinh

Total proteins on  
gels visualized  
using UV (TGX  
Stain-Free 12%  
gels) – Figure  
2Aii

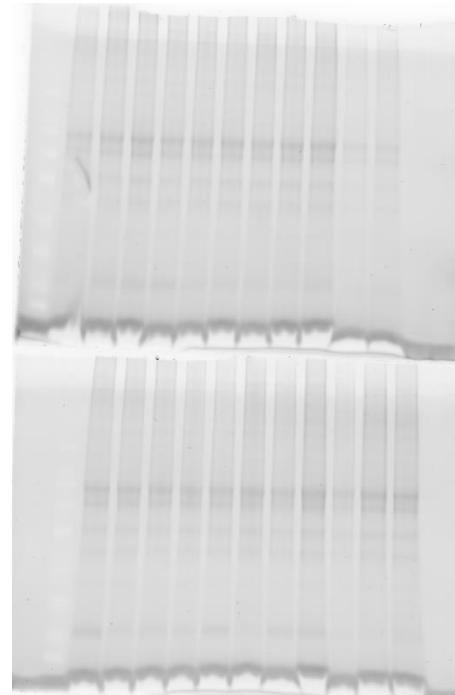

PDH– HPT - Figure 2Avi

Total proteins on gels visualized using UV  
(TGX Stain-Free 12% gels) – Figure 2Avi

CTR | STZ | C+  
GLPR  
inh | S+  
GLPRinh

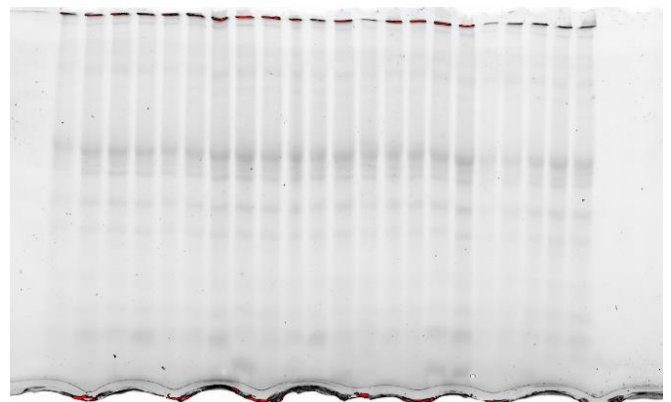

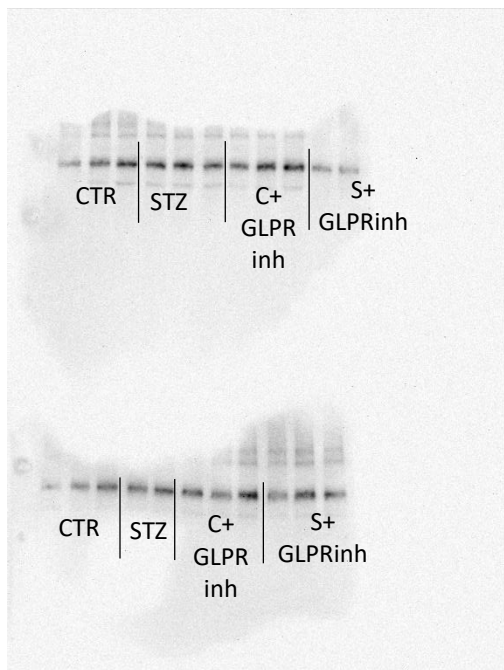

AMPK– HPT  
Figure 3Aiv

Total proteins on  
gels visualized  
using UV (TGX  
Stain-Free 12%  
gels) – Figure  
3Aiv

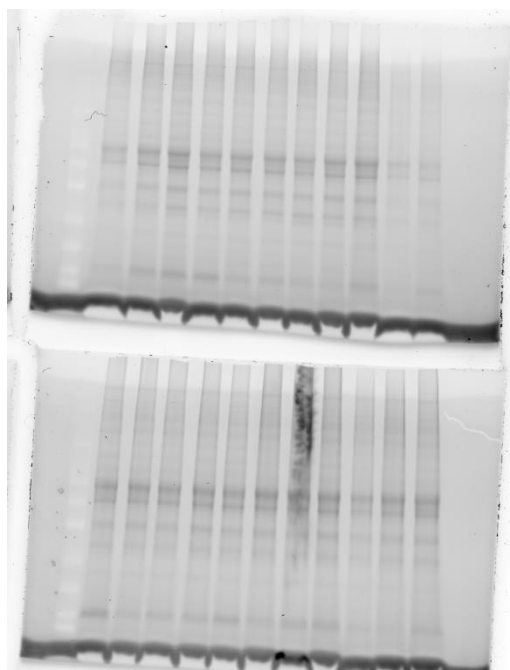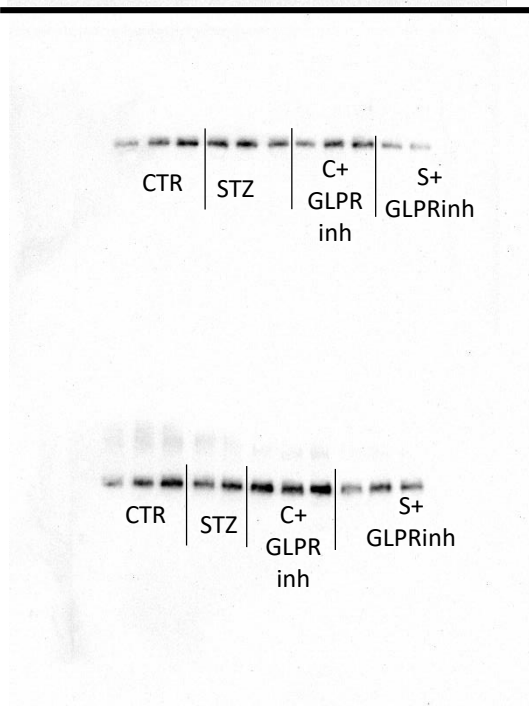

pAMPK– HPT  
Figure 3Aii

Total proteins on  
gels visualized  
using UV (TGX  
Stain-Free 12%  
gels) – Figure  
3Aii

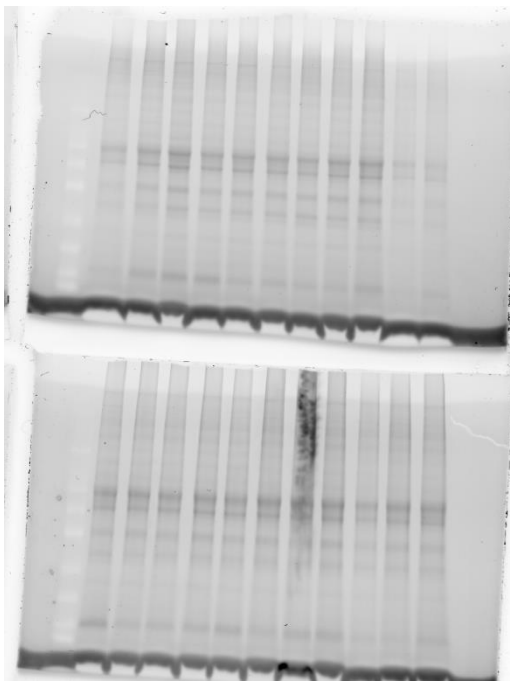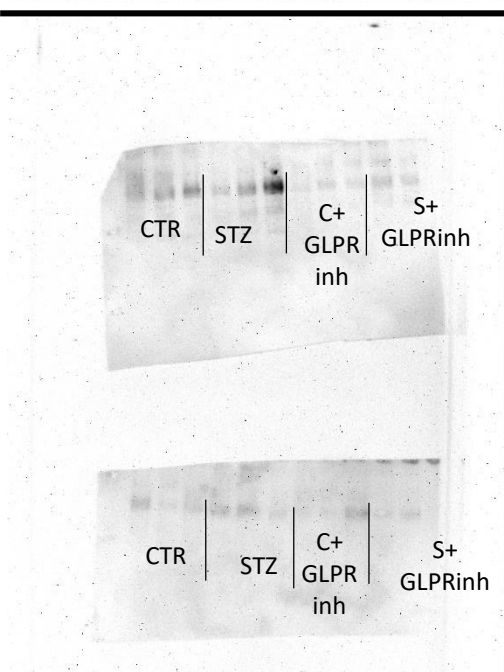

c-fos– HPT  
Figure 4Aii

Total proteins on  
gels visualized  
using UV (TGX  
Stain-Free 12%  
gels) – Figure  
4Aii

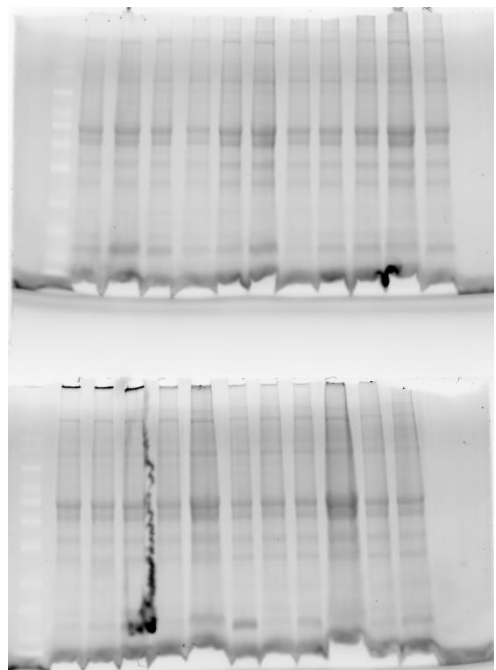

## CytC– HPC Figure 2Biii

Total proteins on  
gels visualized  
using UV (TGX  
Stain-Free 12%  
gels) – Figure  
2Biii

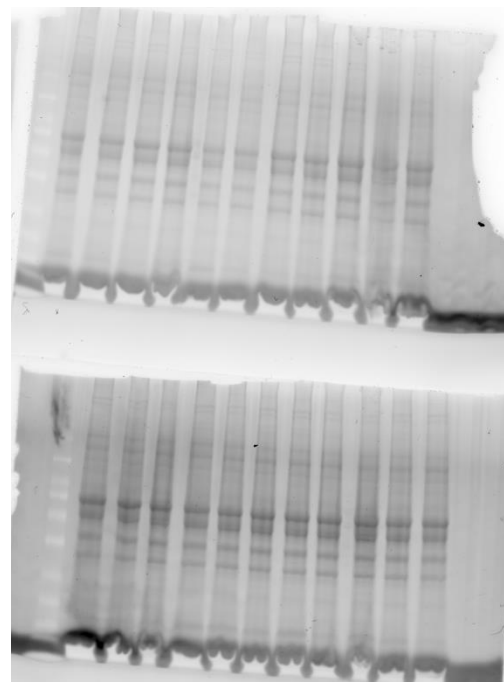

## COXIV– HPC Figure 2Bi

Total proteins on  
gels visualized  
using UV (TGX  
Stain-Free 12%  
gels) – Figure 2Bi

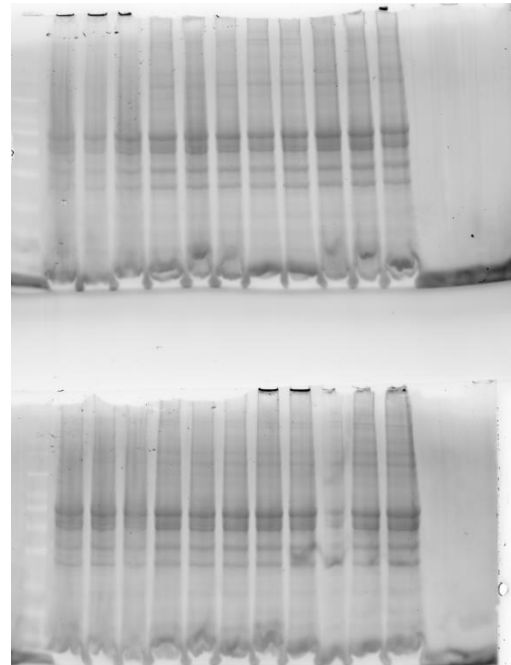

## PDH– HPC Figure 2Bv

Total proteins on  
gels visualized  
using UV (TGX  
Stain-Free 12%  
gels) – Figure  
2Bv

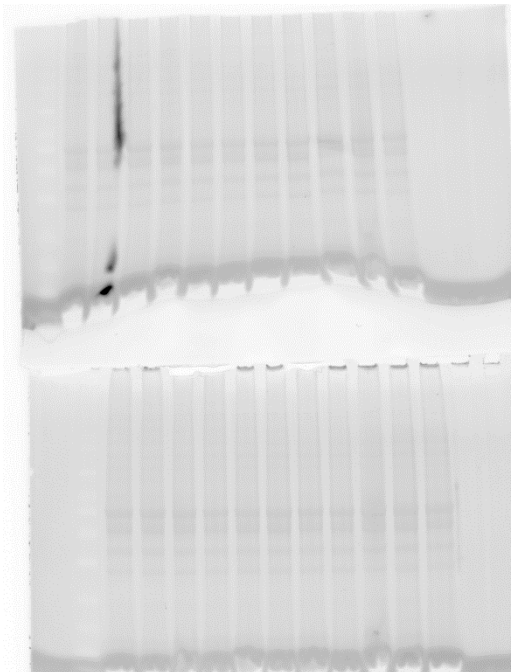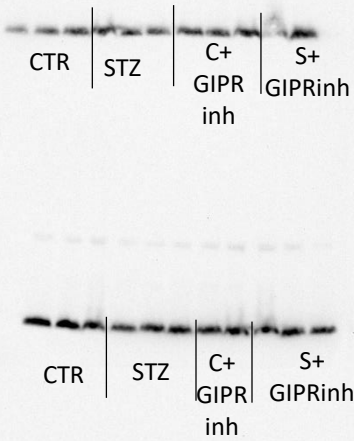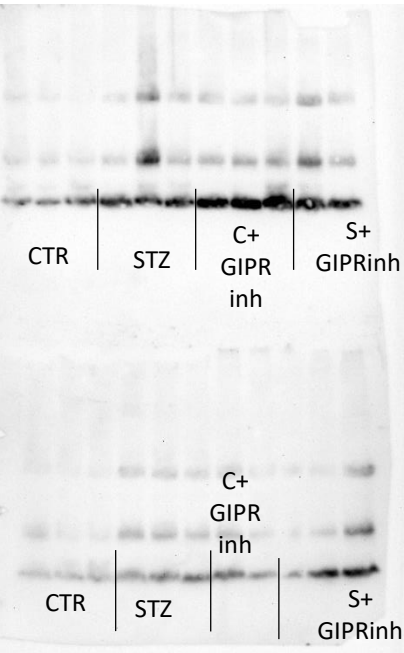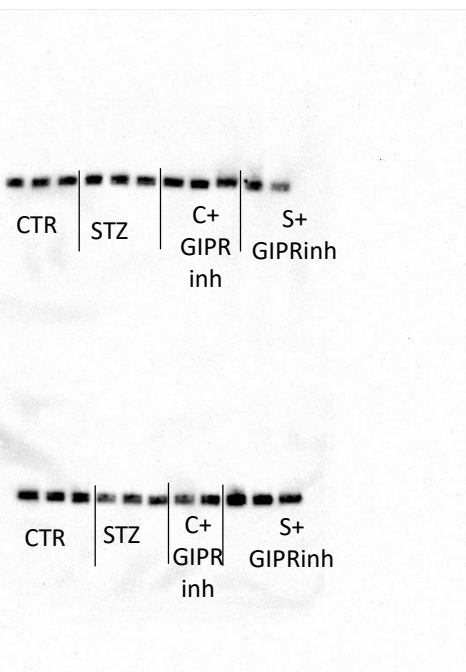



## AMPK– HPC Figure 3Biii

Total proteins on  
gels visualized  
using UV (TGX  
Stain-Free 12%  
gels) – Figure  
3Biii

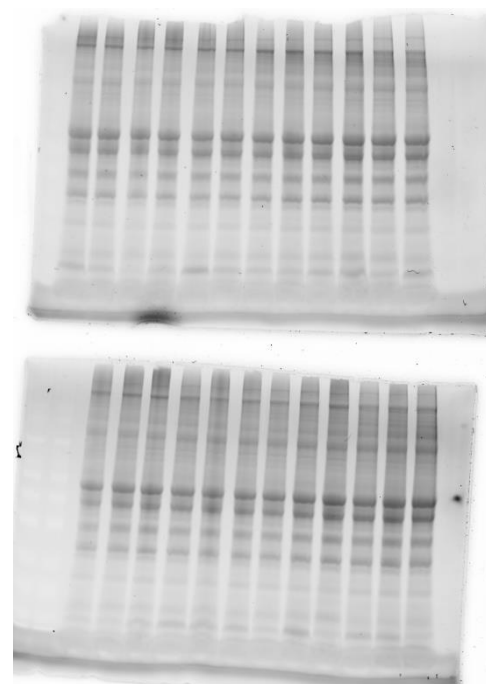

## pAMPK and cAMP – HPC Figure 3Bi and 4Biii

Total proteins on gels visualized  
using UV (TGX Stain-Free 12% gels)  
– Figure 3Bi and 4Biii

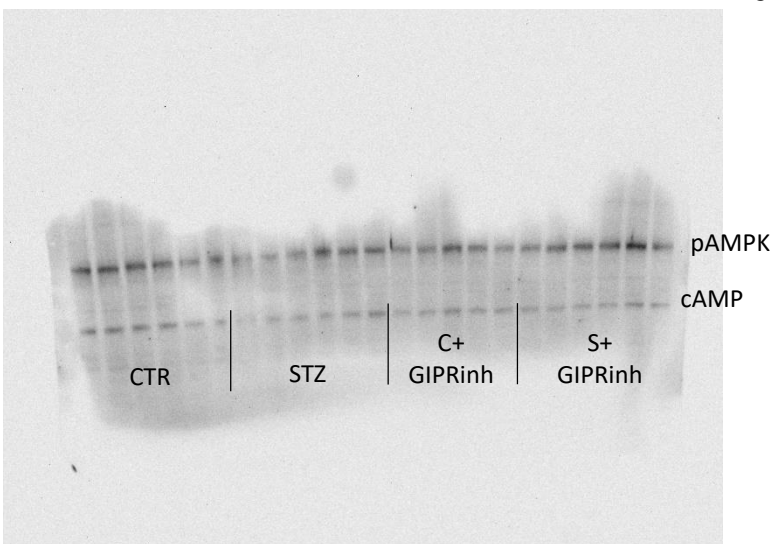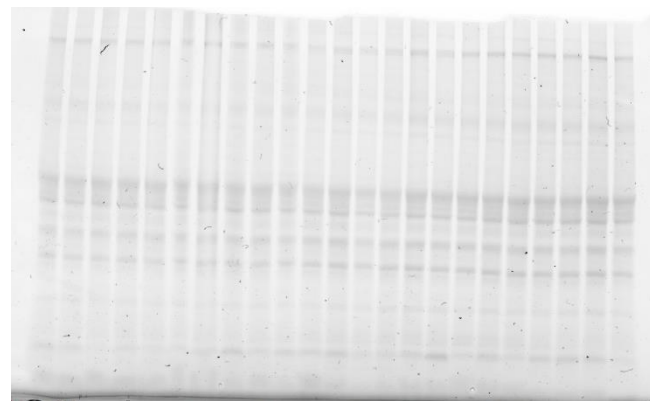

## c-fos– HPC Figure 4Bi

Total proteins on  
gels visualized  
using UV (TGX  
Stain-Free 12%  
gels) – Figure 4Bi

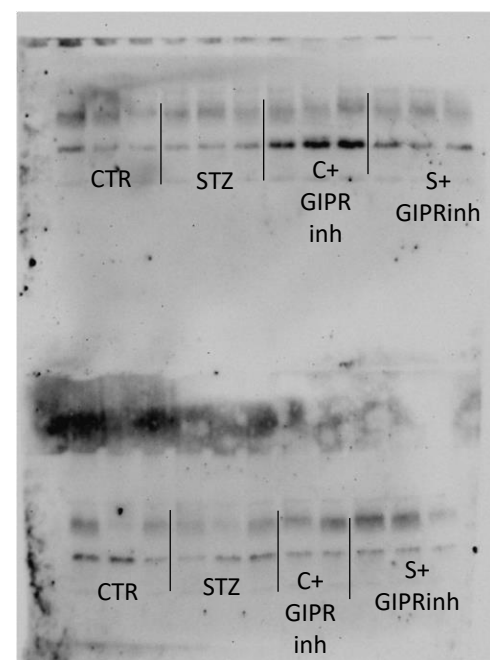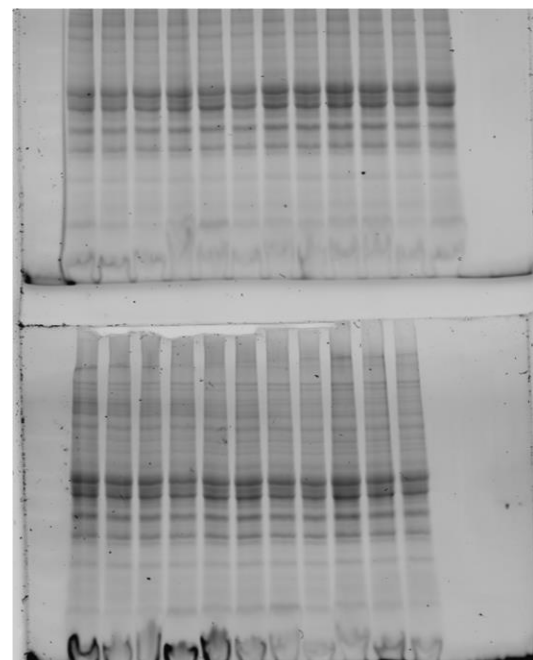

## CytC– HPT Figure 2Bvi

Total proteins on  
gels visualized  
using UV (TGX  
Stain-Free 12%  
gels) – Figure  
2Bvi

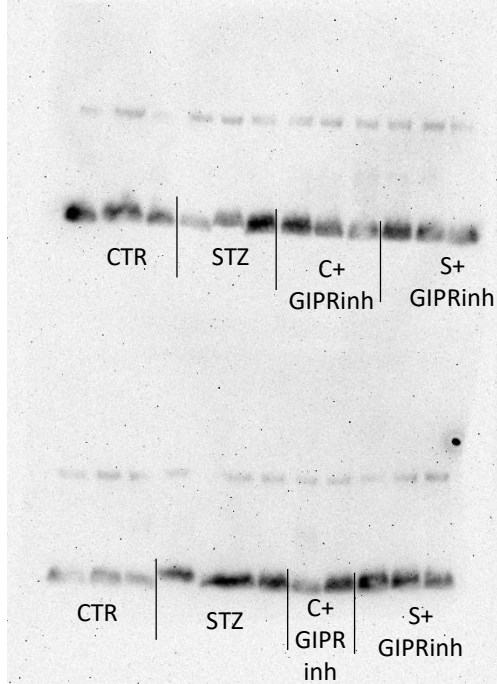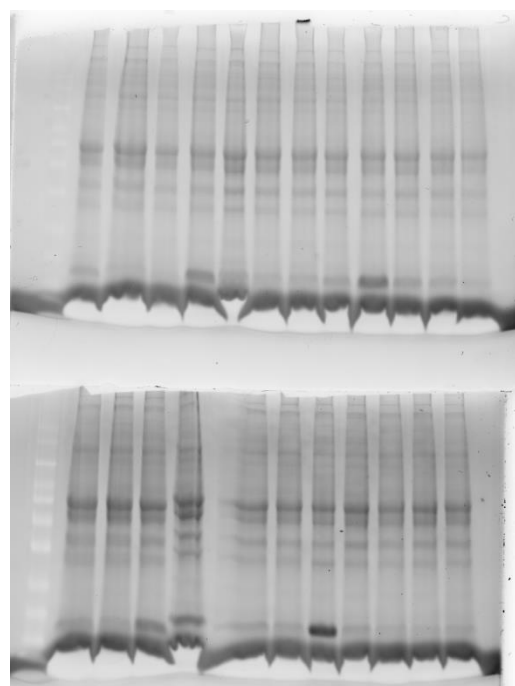

## COXIV– HPT Figure 2Bii

Total proteins on  
gels visualized  
using UV (TGX  
Stain-Free 12%  
gels) – Figure  
2Bii

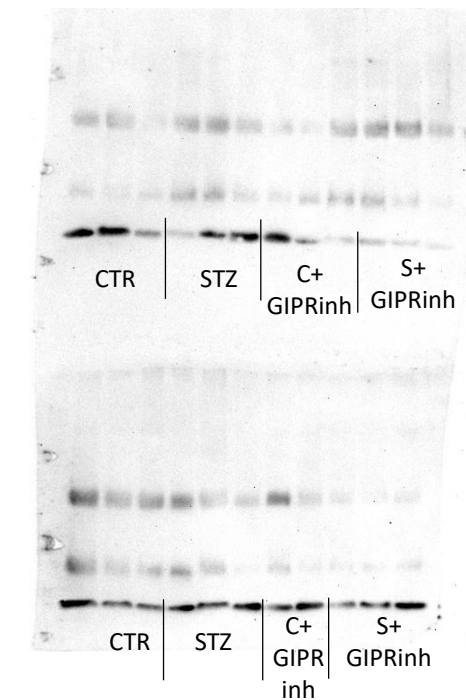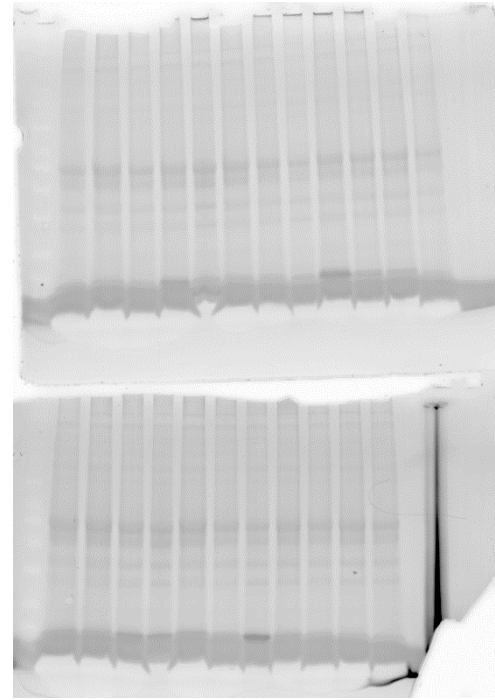

## PDH – HPT Figure 2Bvi

Total proteins on  
gels visualized  
using UV (TGX  
Stain-Free 12%  
gels) – Figure  
2Bvi

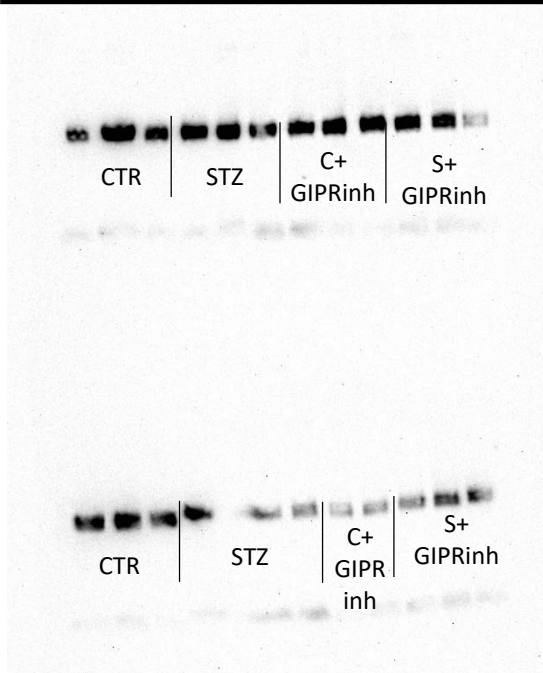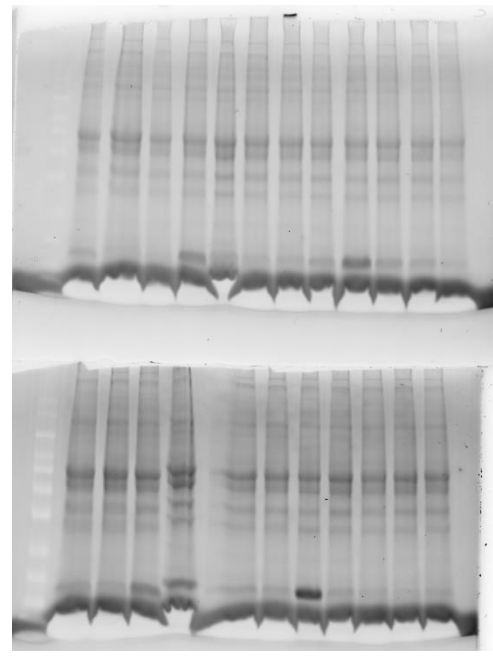

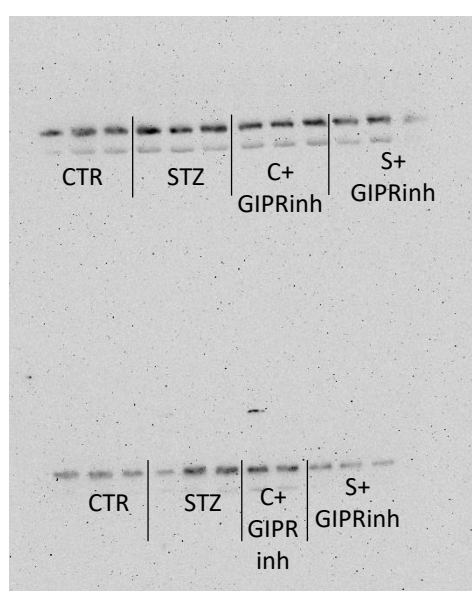

AMPK – HPT

Figure 3Bvi

Total proteins on  
gels visualized  
using UV (TGX  
Stain-Free 12%  
gels) – Figure  
3Bvi

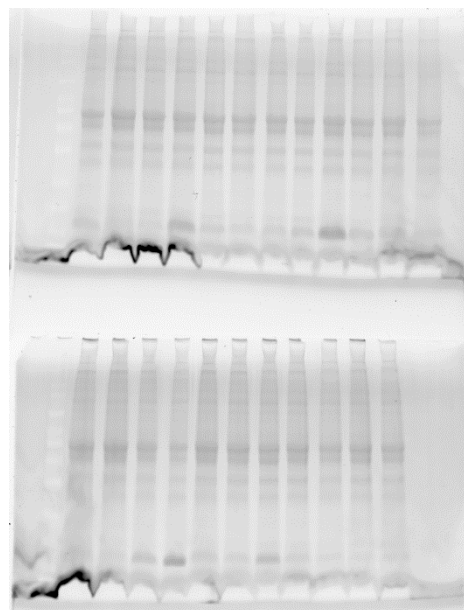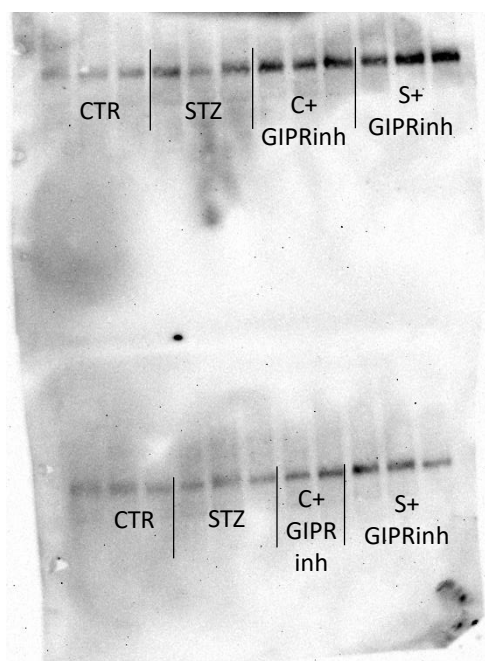

pAMPK – HPT

Figure 3Bii

Total proteins on  
gels visualized  
using UV (TGX  
Stain-Free 12%  
gels) – Figure  
3Bii

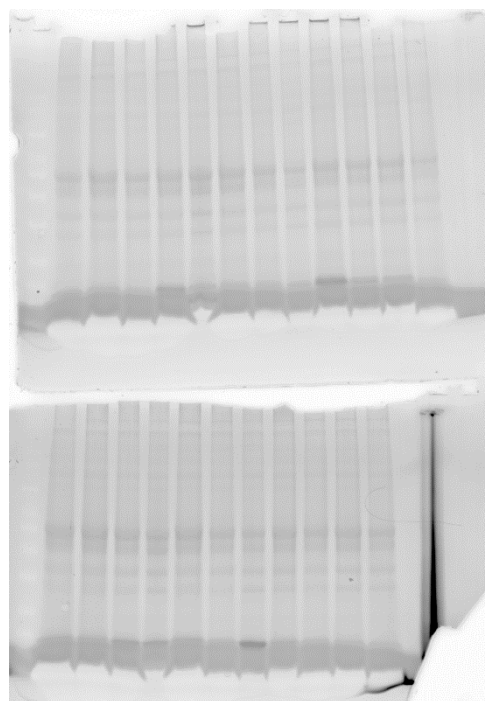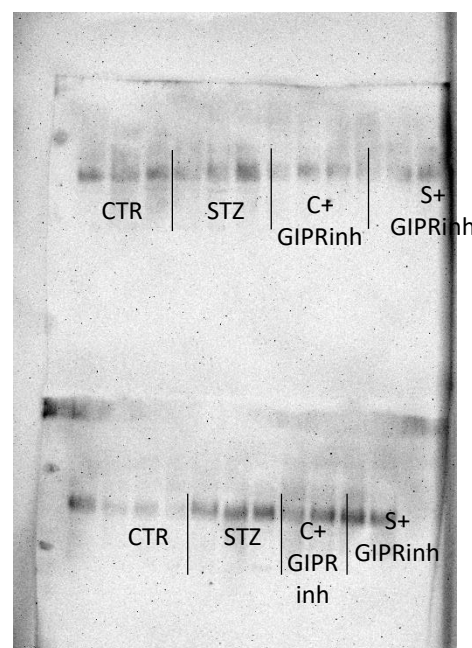

c-fos – HPT

Figure 4Bii

Total proteins on  
gels visualized  
using UV (TGX  
Stain-Free 12%  
gels) – Figure  
4Bii

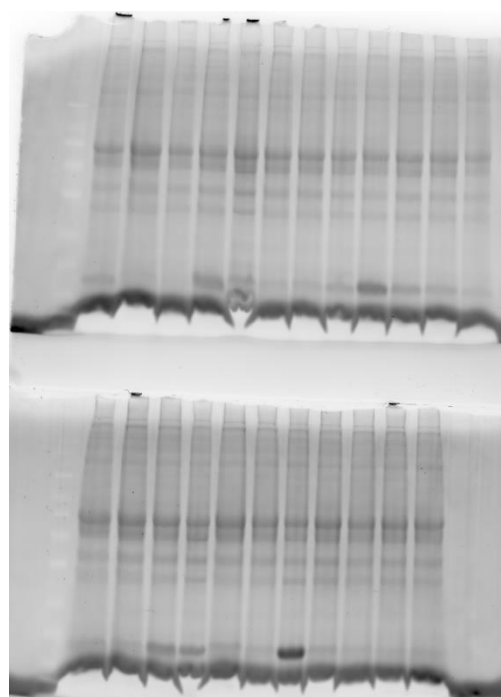





|             | Group | Animal ID | Glucose-plasma | Insulin-plasma | GLP1total-plasma | GLP1active-plasma | GIPTotal-plasma | GIPIActive-plasma | COXIV-HPC | CytC-HPC | PDH-HPC | pAMPK-HPC | tAMPK-HPC | p/tAMPK-HPC | cAMP-HPC | ATP-HPC  | c-fos-HPC | COXIV-HPT | CytC-HPT | PDH-HPT | pAMPK-HPT | tAMPK-HPT | p/tAMPK-HPT | cAMP-HPT | ATP-HPT  | c-fos-HPT |
|-------------|-------|-----------|----------------|----------------|------------------|-------------------|-----------------|-------------------|-----------|----------|---------|-----------|-----------|-------------|----------|----------|-----------|-----------|----------|---------|-----------|-----------|-------------|----------|----------|-----------|
| CTR         |       | 1         | 16.15716       | 3.375331       | 14.54458         | 2.1563            | 172.6468        | 3.982318          | 0.30629   | 1.21848  | 5.62748 | 2.28864   | 3.20843   | 0.713321    | 1.67199  | 17.7328  | 0.71776   | 2.26891   | 1.42809  | 1.29691 | 0.56496   | 0.82782   | 0.682467    | 0.177147 | 16.78641 | 0.87934   |
| CTR         |       | 2         | 0.505749       | 1.06209        | 10.57815         | 1.799             | 182.3813        | 1.930009          | 0.34012   | 1.77628  | 6.45173 | 2.58621   | 3.26968   | 0.790967    | 1.72187  | 17.70701 | 0.53616   | 2.04399   | 0.78274  | 2.10202 | 0.64737   | 0.91549   | 0.70713     | 0.300959 | 13.66298 | 0.77445   |
| CTR         |       | 3         | 12.34426       | 4.139353       | 10.12048         | 2.5676            | 285.0963        | 1.433134          | 0.41937   | 2.11734  | 6.33279 | 2.6898    | 2.15733   | 1.246819    | 1.66207  | 18.59073 | 0.4612    | 1.14519   | 0.73096  | 1.7626  | 0.80881   | 0.95798   | 0.844287    | 0.029653 | 17.7328  | 1.32279   |
| CTR         |       | 4         | 18.33046       |                | 7.902568         | 2.3534            | 1993.656        | 2.059628          | 0.21744   | 0.80556  | 6.70185 | 2.08492   | 6.07105   | 0.34342     | 1.46833  | 20.61629 | 0.63505   | 1.35861   | 0.16235  | 0.65437 | 0.29238   | 0.31544   | 0.926896    | 0.905536 | 19.0378  | 1.09267   |
| CTR         |       | 5         | 13.75628       | 4.16679        | 9.475059         | 2.0312            | 1978.216        | 1.800389          | 0.19208   | 0.89948  | 6.02194 | 1.65936   | 4.84452   | 0.342523    | 1.55227  | 25.33977 | 0.91066   | 0.64174   | 1.77754  | 0.79866 | 0.30611   | 0.43532   | 0.703184    | 0.164719 | 18.64315 | 0.24746   |
| CTR         |       | 6         | 15.2964        | 3.68612        | 11.09449         | 1.9772            | 477.4352        | 1.930009          | 0.2261    | 0.84901  | 6.23385 | 2.51178   | 3.45996   | 0.725956    | 1.43548  | 15.88387 | 0.5265    | 0.65525   | 0.15336  | 0.60969 | 0.3226    | 0.48683   | 0.662654    | 0.08441  | 23.27395 | 0.19167   |
| CTR         |       | 7         | 24.0537        | 3.751459       | 19.94268         | 2.7449            | 111.2192        | 2.059628          |           |          |         |           |           |             |          |          |           |           |          |         |           |           |             |          |          |           |
| CTR         |       | 8         | 10.61243       | 1.001754       | 9.580673         | 2.2193            | 182.0456        | 4.068731          |           |          |         |           |           |             |          |          |           |           |          |         |           |           |             |          |          |           |
| CTR         |       | 9         | 20.58334       | 2.513842       | 14.77928         | 2.078             | 111.8905        | 2.059628          |           |          |         |           |           |             |          |          |           |           |          |         |           |           |             |          |          |           |
| CTR         |       | 10        | 13.24417       | 3.884683       | 13.26546         | 2.9312            | 253.2076        | 1.54115           |           |          |         |           |           |             |          |          |           |           |          |         |           |           |             |          |          |           |
| STZ         |       | 11        | 18.8217        | 2.645205       | 8.735753         | 1.7864            | 1043.039        | 2.362074          | 0.66922   | 2.13557  | 6.64072 | 1.49714   | 1.81611   | 0.824366    | 0.71154  | 28.85995 | 0.40806   | 0.54765   | 0.31229  | 1.8902  | 0.8515    | 1.36283   | 0.624803    | 0.352947 | 21.6275  | 0.78438   |
| STZ         |       | 12        | 16.50362       | 0.867434       | 4.335128         | 1.56284           | 2307.844        | 3.053379          | 0.55675   | 2.19272  | 6.91686 | 1.30859   | 2.11284   | 0.619351    | 0.70282  | 18.64315 | 0.39705   | 1.15022   | 0.45641  | 1.7065  | 0.60043   | 1.18838   | 0.505251    | 0.163016 | 17.88782 | 0.62596   |
| STZ         |       | 13        | 18.54234       | 0.893865       | 8.946983         | 1.7864            | 666.4174        | 1.951612          | 0.71317   | 1.80282  | 6.95927 | 1.59522   | 1.08901   | 1.464835    | 0.87765  | 19.72826 | 0.62567   | 1.31904   | 0.97104  | 1.02481 | 0.89727   | 1.37405   | 0.653011    | 0.287707 | 16.9642  | 1.08798   |
| STZ         |       | 14        | 17.06281       | 0.815105       | 10.30824         | 1.9772            | 459.309         | 2.340471          | 0.22721   | 0.83798  | 3.76782 | 2.18685   | 2.60113   | 0.840731    | 1.00623  | 17.60395 | 0.45853   | 0.88432   | 0.2738   | 0.50313 | 0.29466   |           | 0.706754    | 0.507775 | 17.19365 | 0.1525    |
| STZ         |       | 15        | 17.4091        | 0.925177       | 11.77512         | 2.375             | 126.66          | 2.858948          | 0.33388   | 1.0767   | 4.66911 | 1.90345   | 1.82005   | 1.045823    | 1.00018  | 19.19642 | 0.58064   | 0.53323   | 0.47073  | 0.1959  | 0.35561   | 0.77619   | 0.458148    | 0.1986   | 18.17313 | 0.42675   |
| STZ         |       | 16        | 15.22634       | 8.971501       | 16.44565         | 2.1104            | 75.97386        | 1.865199          | 0.32027   | 1.09486  | 4.6343  | 1.744     | 1.79973   | 0.969034    | 1.08284  | 21.54489 | 0.7213    | 0.86109   | 0.44169  | 0.2143  | 0.3893    | 0.79962   | 0.486856    | 0.082674 | 17.55249 | 0.7283    |
| STZ         |       | 17        | 0.7030201      | 5.416866       | 11.10622         | 1.9259            | 249.8509        |                   |           |          |         |           |           |             |          |          |           |           |          |         |           |           |             |          |          |           |
| STZ         |       | 18        | 12.36048       | 0.06687        | 5.731593         | 2.1932            | 2060.119        | 2.686123          |           |          |         |           |           |             |          |          |           |           |          |         |           |           |             |          |          |           |
| STZ         |       | 19        | 26.17888       | 2.962806       | 6.024968         | 2.0195            | 1838.913        | 2.102835          |           |          |         |           |           |             |          |          |           |           |          |         |           |           |             |          |          |           |
| STZ         |       | 20        | 14.54072       | 0.13975        | 11.29398         | 2.7584            | 1476.725        | 1.973216          |           |          |         |           |           |             |          |          |           |           |          |         |           |           |             |          |          |           |
| CTR+GIPRinh |       | 21        | 20.07588       | 9.80827        | 13.96956         | 2.7575            | 3839.506        | 513.8839          | 1.12782   | 1.69243  | 7.91797 | 1.95743   | 1.51031   | 1.296045    | 1.07921  | 24.4427  | 1.26716   | 1.72214   | 0.9747   | 1.48728 | 1.50967   | 1.14214   | 1.321791    | 0.302003 | 22.45946 | 0.31099   |
| CTR+GIPRinh |       | 22        | 30.70064       | 4.658765       | 8.841368         | 1.9484            | 119.6109        | 204.1796          | 1.17078   | 1.38191  | 7.76871 | 1.60512   | 1.20898   | 1.327665    | 0.67709  | 29.16595 | 1.86042   | 0.66165   | 0.72468  | 1.91676 | 1.74902   | 1.19807   | 1.459865    | 0.51308  | 17.14257 | 0.68214   |
| CTR+GIPRinh |       | 23        | 15.03968       | 4.183654       | 12.43228         | 2.1176            | 170.6328        | 763.963           | 1.18416   | 1.49602  | 7.49287 | 1.46062   | 1.55315   | 0.940424    | 0.94836  | 27.34795 | 1.69186   | 0.21332   | 0.55147  | 1.73015 | 1.43543   | 1.11345   | 1.289173    | 0.017333 | 19.80845 | 0.77743   |
| CTR+GIPRinh |       | 24        | 15.05425       | 8.517301       | 13.19505         | 2.294             | 2313.886        | 838.9911          | 0.40834   | 1.27246  | 5.04308 | 1.24017   | 2.06791   | 0.59972     | 0.76572  | 18.17313 | 0.57071   | 0.54314   | 0.22433  | 0.12814 | 0.46019   | 0.78604   | 0.585454    | 0.100025 | 19.8352  | 0.81718   |
| CTR+GIPRinh |       | 25        | 25.01343       | 8.748527       | 17.43139         | 2.3633            | 4157.05         | 191.3689          | 0.23526   | 1.36786  | 5.62154 | 0.93372   | 1.53328   | 0.608969    | 0.8094   | 16.03363 | 0.54006   | 0.70594   | 0.3841   | 0.14433 | 0.52451   | 0.62982   | 0.832793    | 0.269381 | 12.78941 | 0.75771   |
| CTR+GIPRinh |       | 26        | 16.8091        | 3.513341       | 9.568938         | 2.3291            | 2263.2          | 855.2584          |           |          |         |           |           |             |          |          |           |           |          |         |           |           |             |          |          |           |
| CTR+GIPRinh |       | 27        | 11.73835       | 5.661367       | 6.212727         |                   | 4012.04         | 80.84668          |           |          |         |           |           |             |          |          |           |           |          |         |           |           |             |          |          |           |
| CTR+GIPRinh |       | 28        | 12.94242       | 8.359073       | 11.81032         | 2.6342            | 2020.846        | 430.9489          |           |          |         |           |           |             |          |          |           |           |          |         |           |           |             |          |          |           |
| STZ+GIPRinh |       | 29        | 16.52353       | 6.299046       | 13.35934         | 2.7395            | 2680.102        | 129.2812          | 0.75277   | 0.90645  | 7.07201 | 0.9315    | 1.83944   | 0.506404    | 0.57437  | 20.15718 | 0.89172   | 0.32908   | 0.89955  | 1.49764 | 1.36467   | 0.89943   | 1.517261    | 0.346887 | 17.52678 | 0.59996   |
| STZ+GIPRinh |       | 30        | 37.42585       | 9.337687       | 1.811682         | 2.2256            | 2938.232        | 119.6677          | 0.60063   | 1.39082  | 6.08089 | 1.15839   | 2.34612   | 0.493747    | 0.66963  | 18.38155 | 0.75319   | 0.15421   | 0.67796  | 1.26015 | 1.76014   | 0.78422   | 2.244447    | 0.254857 | 20.50795 | 0.77595   |
| STZ+GIPRinh |       | 31        | 12.18244       | 7.294388       | 9.181682         | 2.2904            | 1519.019        | 239.825           | 0.36834   | 1.11113  | 6.74139 | 0.91181   | 1.59753   | 0.570762    | 0.52914  | 22.48737 | 0.59852   | 0.1519    | 0.6944   | 0.3199  | 2.37542   | 0.2807    |             | 0.349298 | 17.86195 | 1.52897   |
| STZ+GIPRinh |       | 32        | 15.90128       | 6.535737       | 3.847472         | 1.7666            | 3077.871        | 215.6276          | 0.61495   | 1.11281  | 5.54052 | 0.96535   | 2.35773   | 0.40944     | 0.84283  | 24.41395 | 0.50524   | 0.33241   | 0.51683  | 0.22737 | 0.71701   | 0.49499   | 1.448534    | 0.163016 | 14.77194 | 0.94229   |
| STZ+GIPRinh |       | 33        | 12.15337       | 6.569736       | 4.921877         | 2.0573            | 2182.974        | 289.0804          | 0.65378   | 1.0806   | 5.68357 | 1.28222   | 2.18765   | 0.586118    | 0.80069  | 28.67693 | 0.55699   | 0.47544   | 0.39487  | 0.39676 | 0.58044   | 0.30758   | 1.887119    |          | 22.45946 | 1.08856   |
| STZ+GIPRinh |       | 34        | 5.126925       | 1.526362       | 7.069383         | 3.977             | 2105.099        | 51.0342           |           |          |         | 0.6977    | 1.32045   | 0.52838     | 0.85429  |          | 0.37789   | 0.79474   | 0.72208  | 0.27755 | 0.46538   | 0.2024    | 2.299308    | 0.139004 | 20.72481 | 0.73294   |
| STZ+GIPRinh |       | 35        | 24.12253       | 6.113601       | 5.555568         | 2.0654            | 2382.698        | 368.3427          |           |          |         |           |           |             |          |          |           |           |          |         |           |           |             |          |          |           |
| STZ+GIPRinh |       | 36        | 32.60823       | 7.940767       | 8.888308         | 3.347             | 2443.79         | 446.2008          |           |          |         |           |           |             |          |          |           |           |          |         |           |           |             |          |          |           |
| STZ+GIPRinh |       | 37        | 8.887614       | 6.568378       | 7.069383         | 2.3147            | 2364.908        | 115.6927          |           |          |         |           |           |             |          |          |           |           |          |         |           |           |             |          |          |           |
| STZ+GIPRinh |       | 38        | 16.24307       | 3.484942       | 19.97788         | 2.8565            | 2771.068        | 286.9417          |           |          |         |           |           |             |          |          |           |           |          |         |           |           |             |          |          |           |

## Confirmation of Publication and Licensing Rights

December 27th, 2021  
Science Suite Inc.

**Subscription:** Student Plan  
**Agreement number:** FQ23D8RUNI  
**Journal name:** International Journal of Molecular Sciences

To whom this may concern,

This document is to confirm that Anthony Farma has been granted a license to use the BioRender content, including icons, templates and other original artwork, appearing in the attached completed graphic pursuant to BioRender's [Academic License Terms](#). This license permits BioRender content to be sublicensed for use in journal publications.

All rights and ownership of BioRender content are reserved by BioRender. All completed graphics must be accompanied by the following citation: "Created with BioRender.com".

BioRender content included in the completed graphic is not licensed for any commercial uses beyond publication in a journal. For any commercial use of this figure, users may, if allowed, recreate it in BioRender under an Industry BioRender Plan.

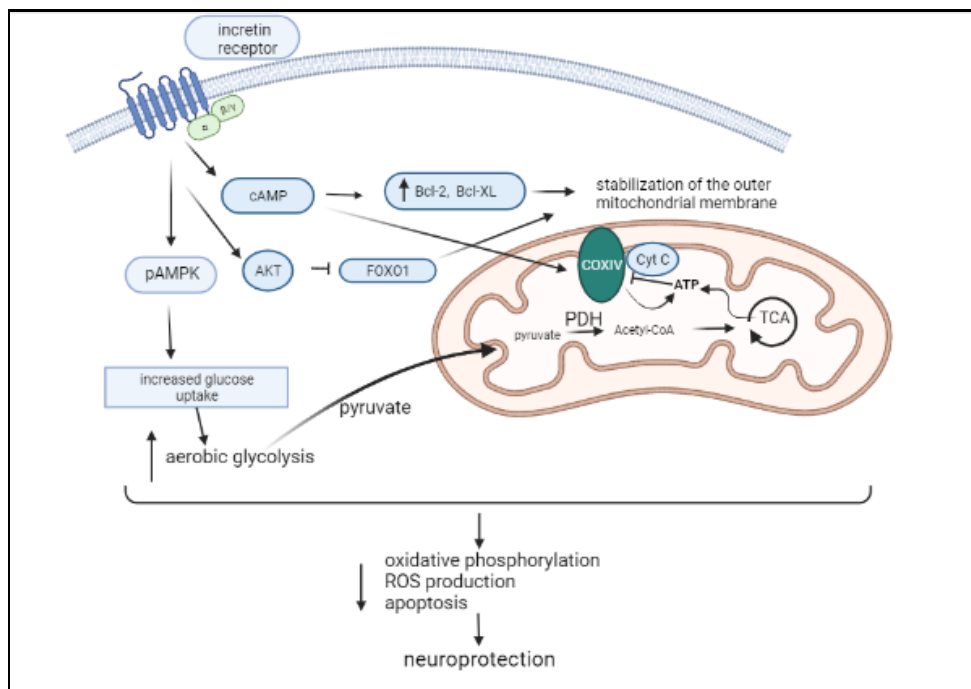

For any questions regarding this document, or other questions about publishing with BioRender refer to our [BioRender Publication Guide](#), or contact BioRender Support at [support@biorender.com](mailto:support@biorender.com).

## Confirmation of Publication and Licensing Rights

December 21st, 2021

Science Suite Inc.

**Subscription:**

*Student Plan*

**Agreement number:**

*WA23CFFHT9*

**Journal name:**

*international journal of molecular sciences*

To whom this may concern,

This document is to confirm that Anthony Farma has been granted a license to use the BioRender content, including icons, templates and other original artwork, appearing in the attached completed graphic pursuant to BioRender's [Academic License Terms](#). This license permits BioRender content to be sublicensed for use in journal publications.

All rights and ownership of BioRender content are reserved by BioRender. All completed graphics must be accompanied by the following citation: "Created with BioRender.com".

BioRender content included in the completed graphic is not licensed for any commercial uses beyond publication in a journal. For any commercial use of this figure, users may, if allowed, recreate it in BioRender under an Industry BioRender Plan.

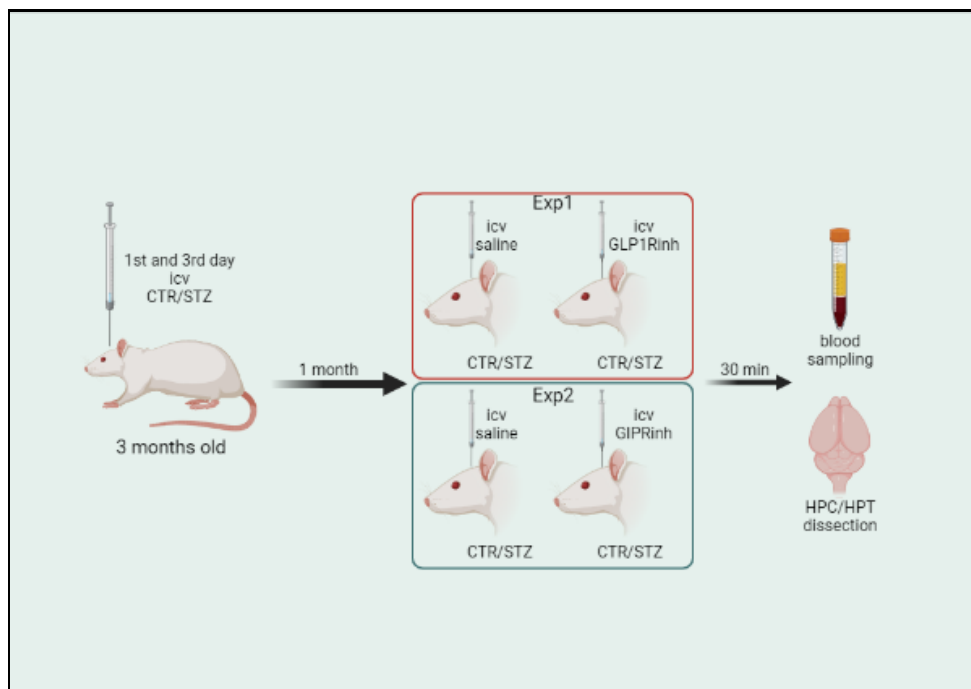

For any questions regarding this document, or other questions about publishing with BioRender refer to our [BioRender Publication Guide](#), or contact BioRender Support at [support@biorender.com](mailto:support@biorender.com).
